# Supplementary material for: Synthesis of novel 3-hydroxy-2-naphthoic hydrazones as selective chemosensors for cyanide ions
Source: Royal Society of Chemistry journal article supplement (doi:10.1039/d3ra00788j), 2023-01-01
Supplement: d3ra00788j1.pdf [file d3ra00788j1.pdf]

Supplementary Information for

## Synthesis of Novel 3-Hydroxy-2-naphthoic hydrazones as Selective Chemosensors for Cyanide Ion

Rima D. Alharthy,<sup>a</sup> Ifra Urooj<sup>b</sup>, Mussarat Tasleem<sup>b</sup>, Muhammad Khalid\*,<sup>c,d</sup> Muhammad Adnan Asghar,<sup>e</sup> Shaista Ijaz Khan<sup>b</sup>, Muhammad Ajmal<sup>b</sup>, Nadeem Ahmed<sup>b</sup> and Zahid Shafiq<sup>b,\*</sup>

<sup>a</sup> Department of Chemistry, Science & Arts College, Rabigh Branch, King Abdulaziz University,

Rabigh 21911, Saudi Arabia

<sup>b</sup> Institute of Chemical Sciences, Bahauddin Zakariya University, 60800 Multan, Pakistan

<sup>c</sup> Institute of Chemistry, Khwaja Fareed University of Engineering & Information Technology, Rahim Yar Khan, 64200, Pakistan

<sup>d</sup> Centre for Theoretical and Computational Research, Khwaja Fareed University of Engineering & Information Technology, Rahim Yar Khan, 64200, Pakistan

<sup>e</sup> Department of Chemistry, Division of Science and Technology, University of Education Lahore, Pakistan

### Content

|                                                            |        |
|------------------------------------------------------------|--------|
| 1. <sup>1</sup> H NMR spectra of IF-1 .....                | S.I-1  |
| 2. <sup>13</sup> C NMR spectra of IF-1.....                | S.I-2  |
| 3. <sup>1</sup> H NMR spectra of IF-2 .....                | S.I-3  |
| 4. <sup>13</sup> C NMR spectra of IF-2.....                | S.I-4  |
| 5. HRMS Spectra of IF-1.....                               | S.I-5  |
| 6. HRMS Spectra of IF-2.....                               | S.I-6  |
| 7. Color change of IF-2.....                               | S.I-7  |
| 8. BH plot of chemosensor IF-2.....                        | S.I-8  |
| 9. Linear plot of chemosensor IF-2.....                    | S.I-9  |
| 10. HRMS Spectra of IF-2 after the addition of CN ion..... | S.I-10 |
| 11. FMOs surfaces of IF-1 and its complex.....             | S.I-11 |

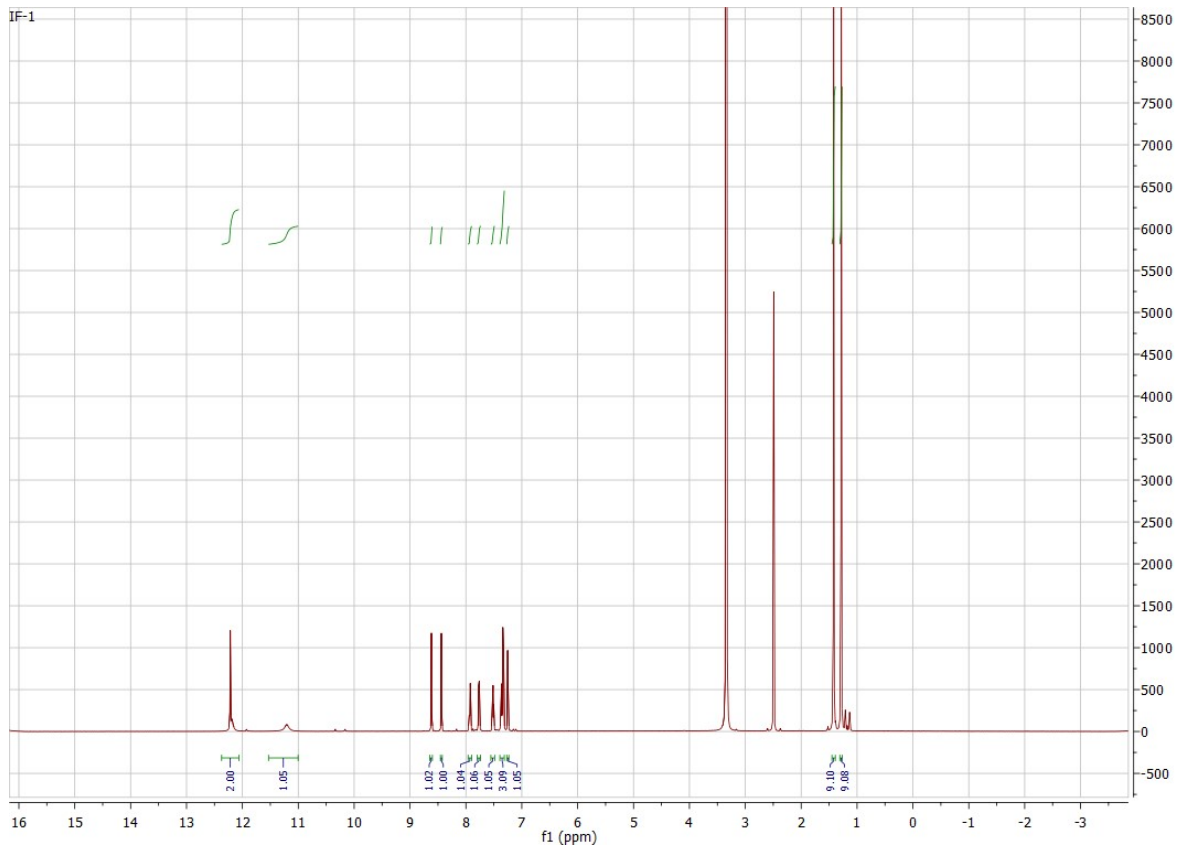

**S.I-1** <sup>1</sup>H NMR spectra of IF-1

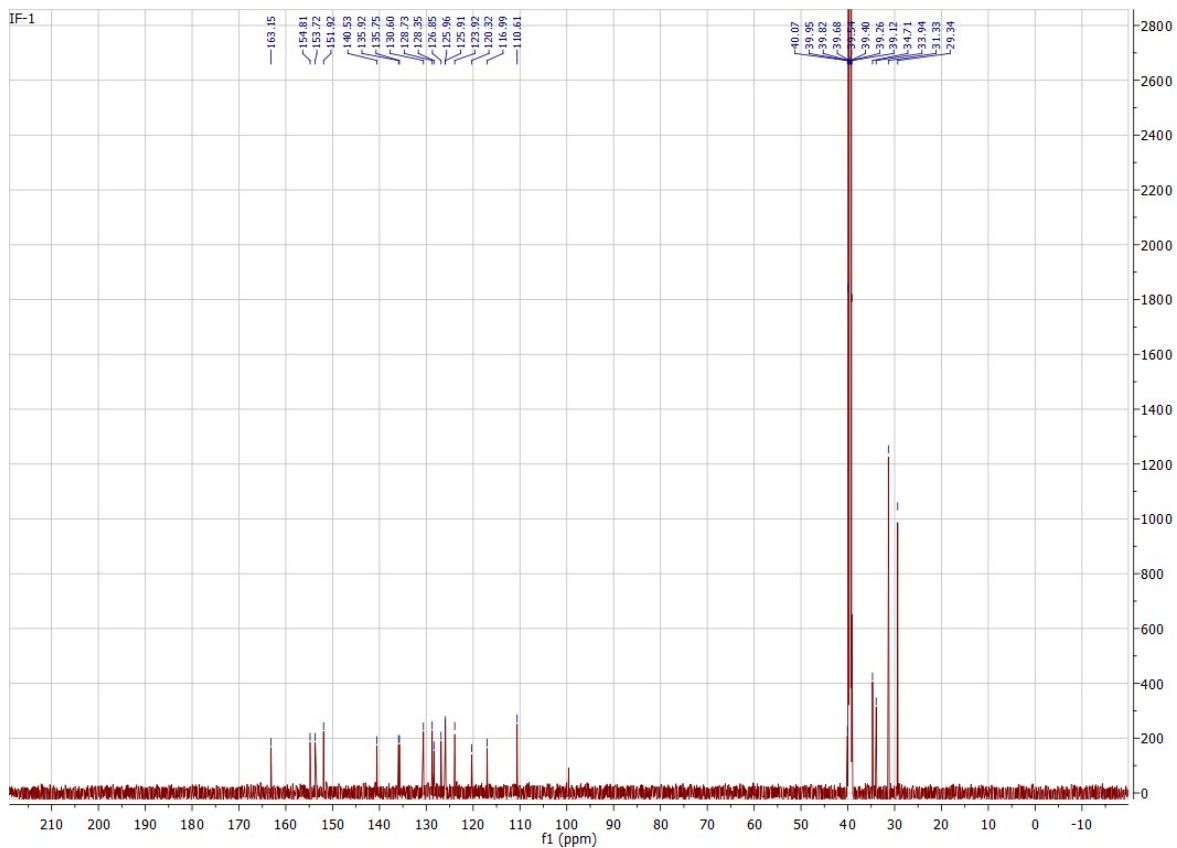

S.I-2  $^{13}\text{C}$  NMR spectra of IF-1

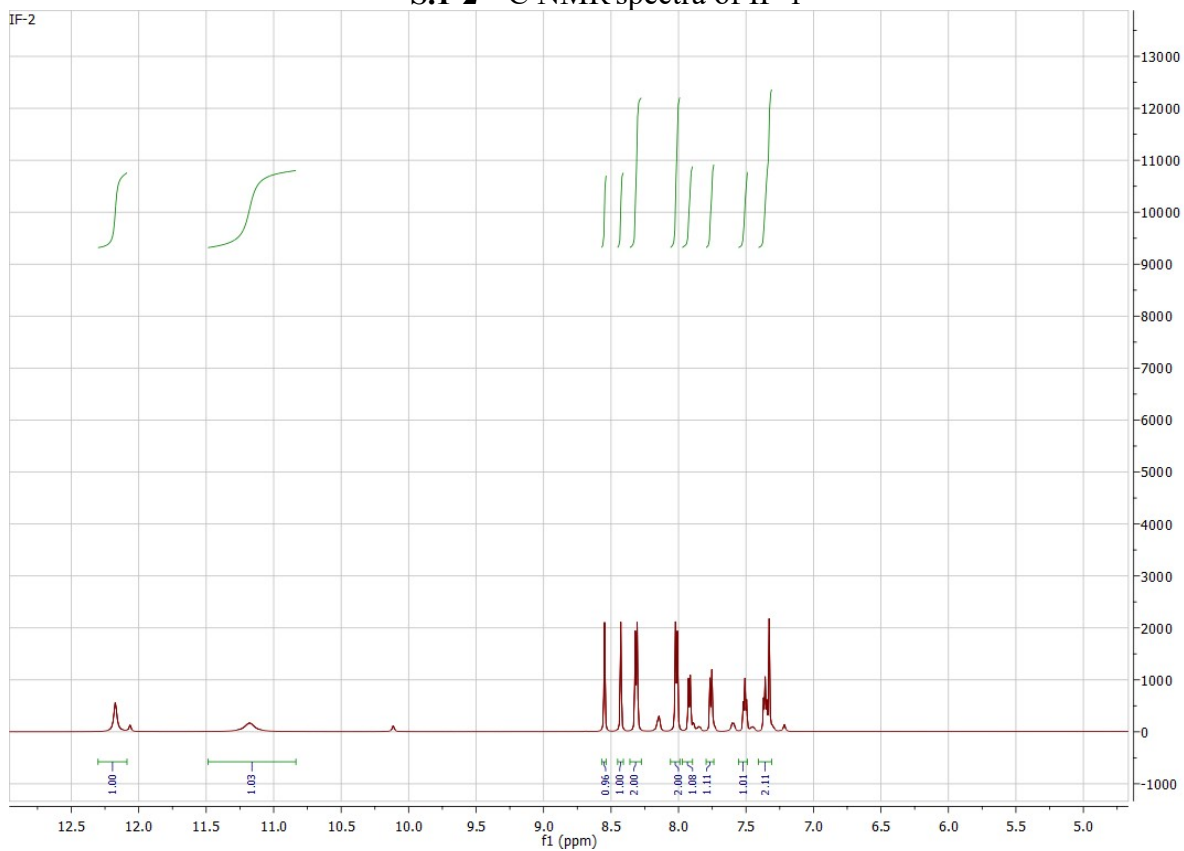

S.I-3  $^1\text{H}$  NMR spectra of IF-2

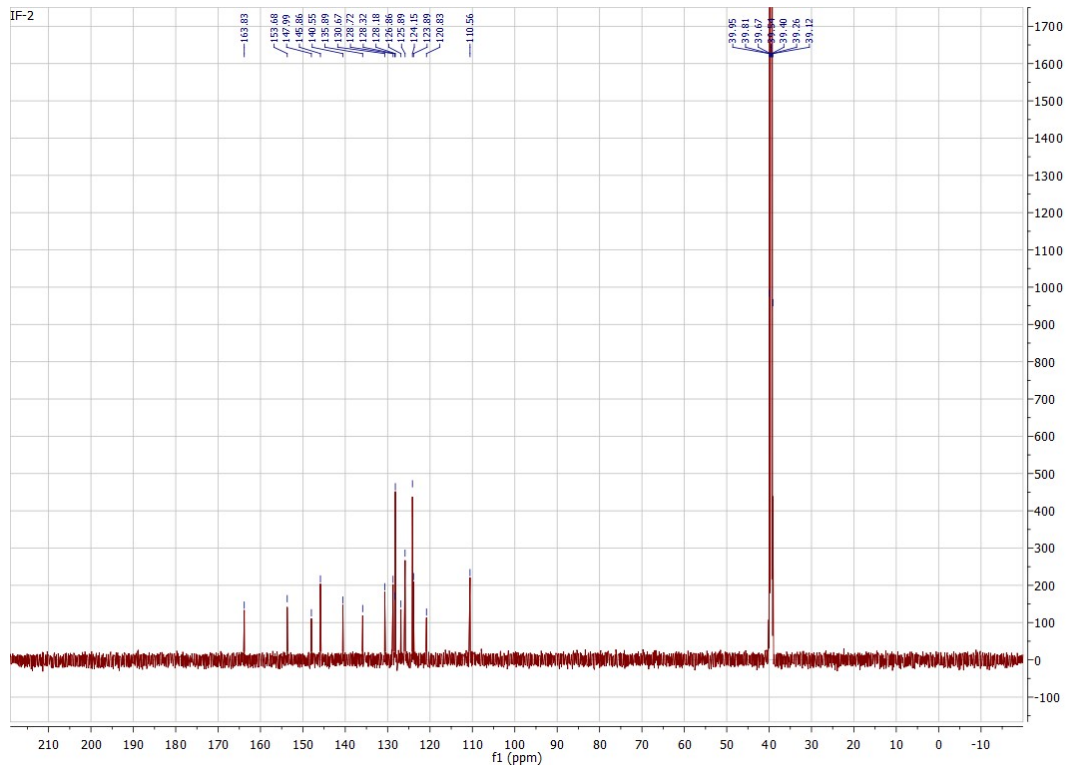

S.1-4 <sup>13</sup>C NMR spectra of IF-2

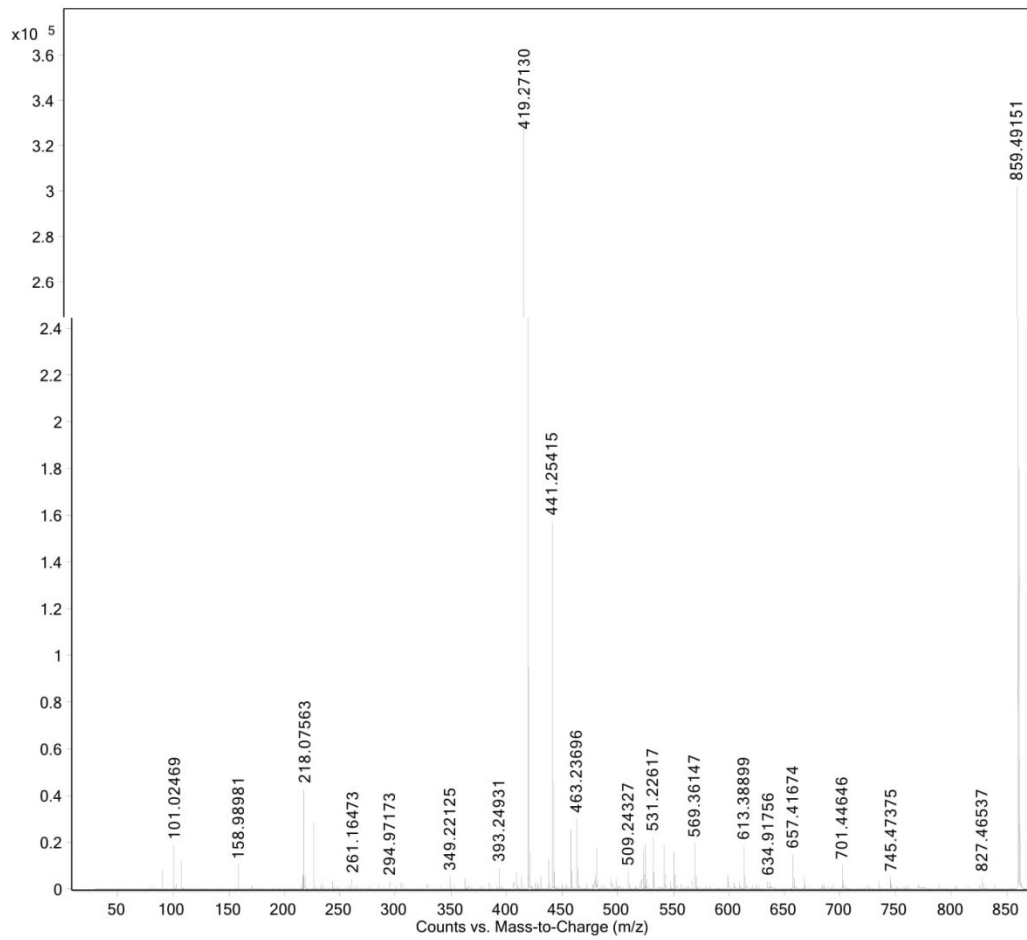

### S.I-5 HRMS of IF-1

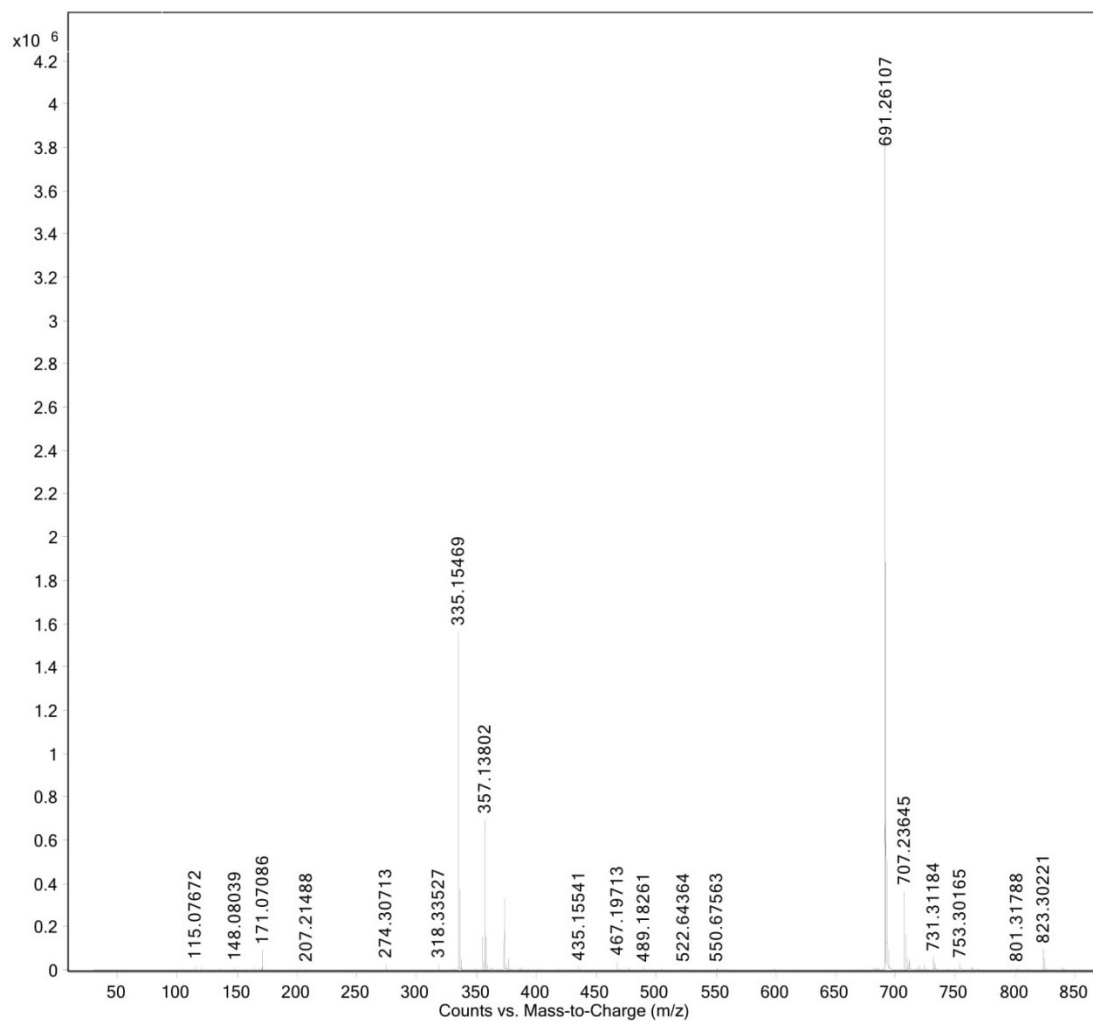

### S.I-6 HRMS of IF-2

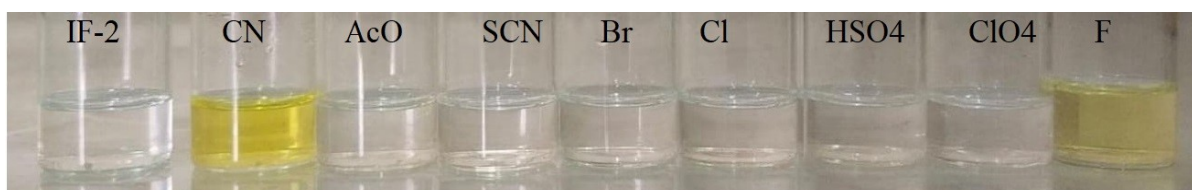

### S.I.7 Color change of IF-2

**BH Plot of IF-2 (CN)**

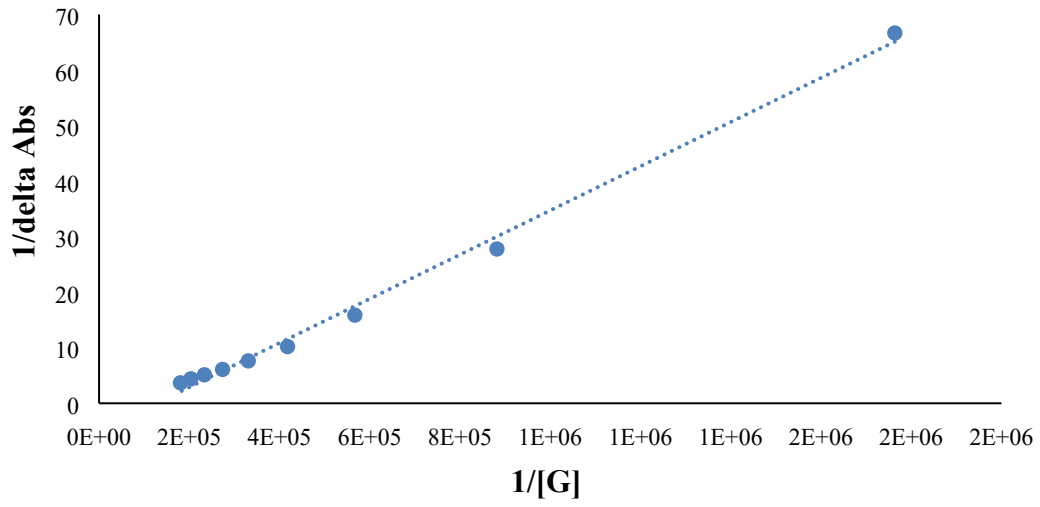

**S.I-8 BH plot of chemosensor IF-2**

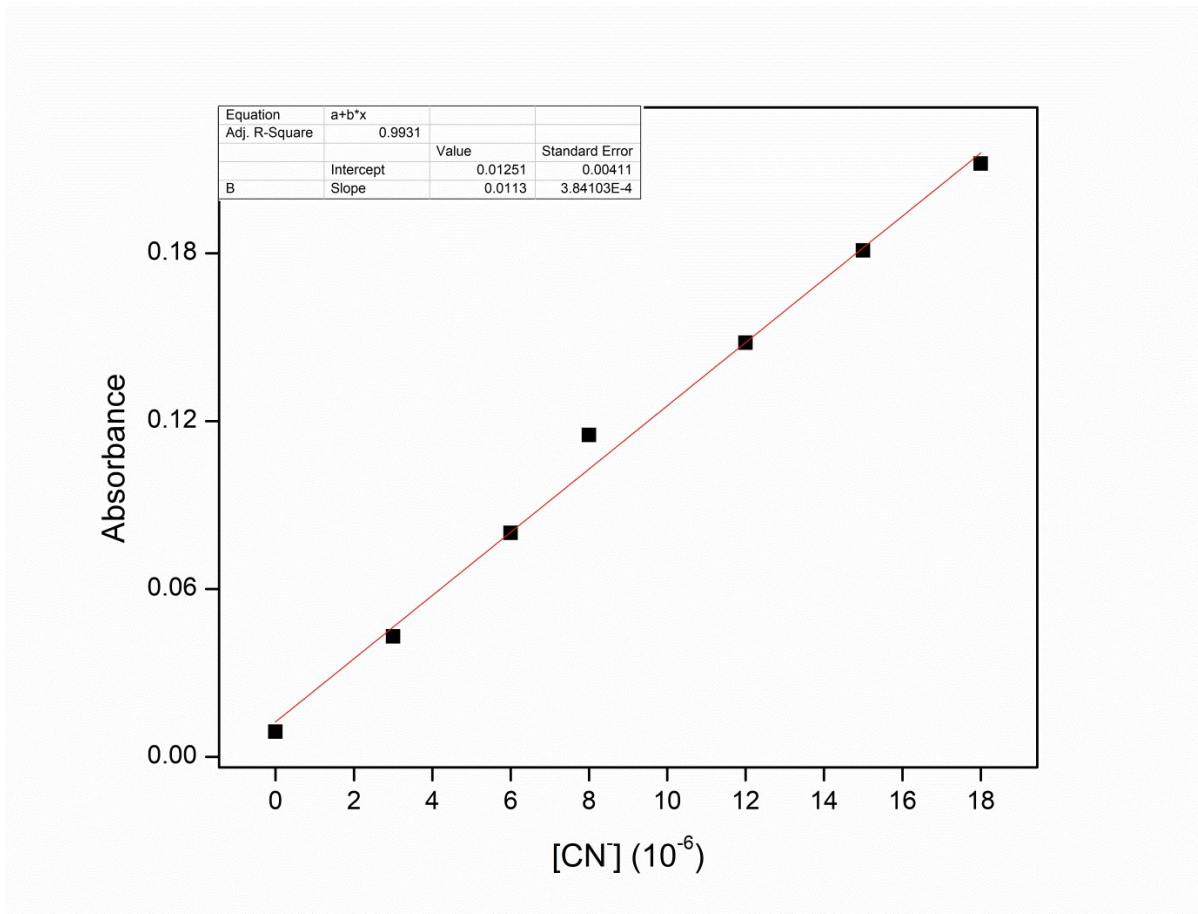

**S.I-9 Linear plot of chemosensor IF-2**

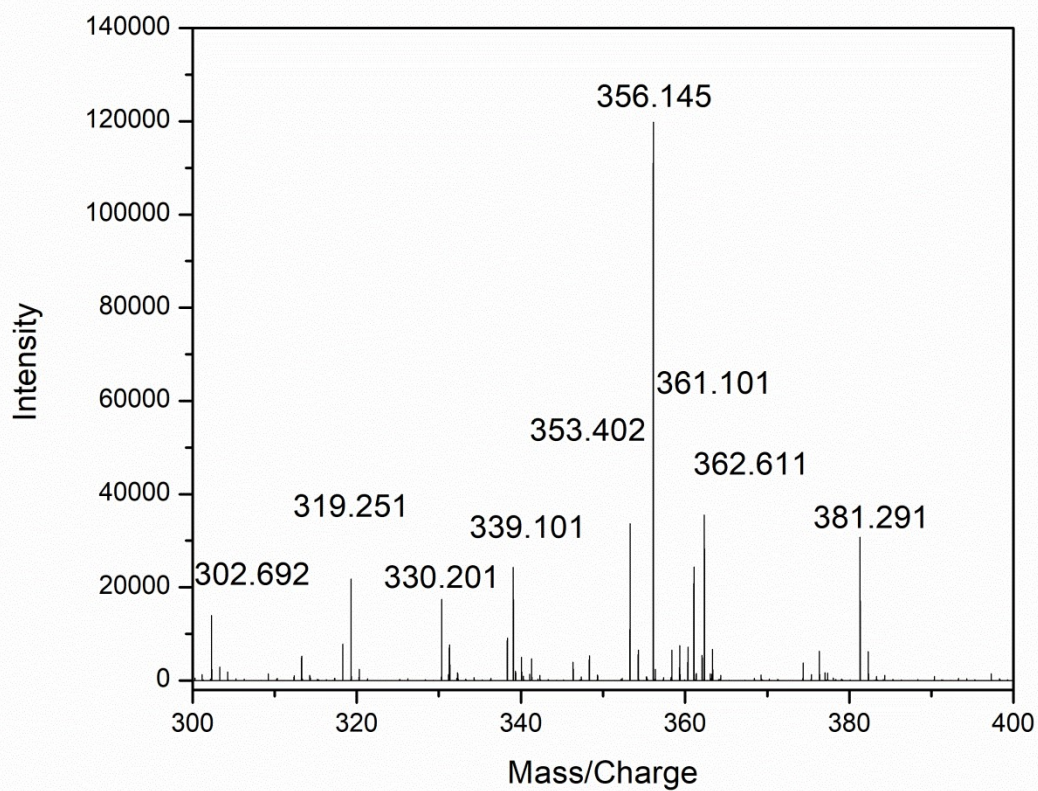

**S.I-10** HRMS Spectra of IF-2 after the addition of CN<sup>-</sup> ions

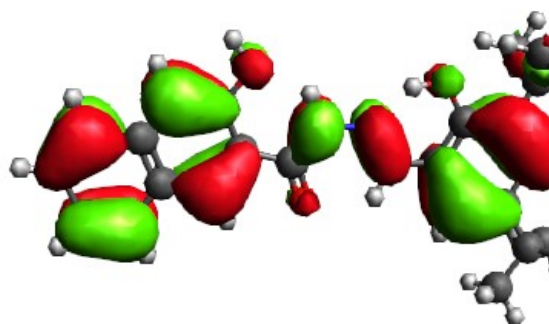

**HOMO -1**

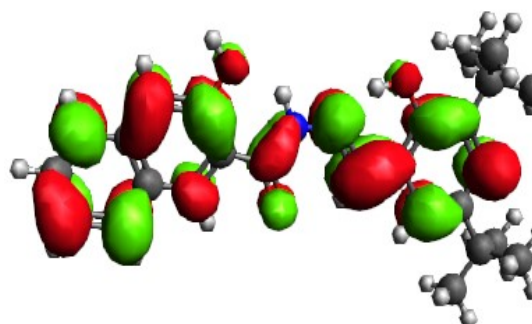

**LUMO +1**

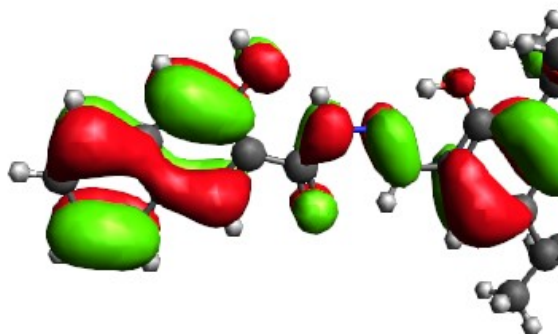

**HOMO -2**

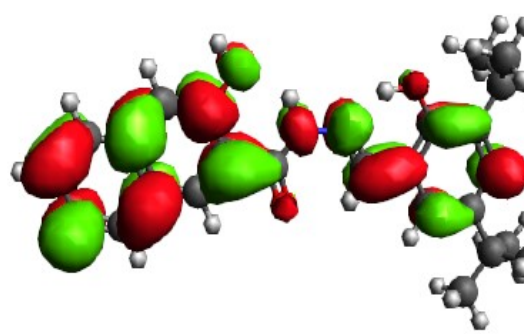

**LUMO +2**

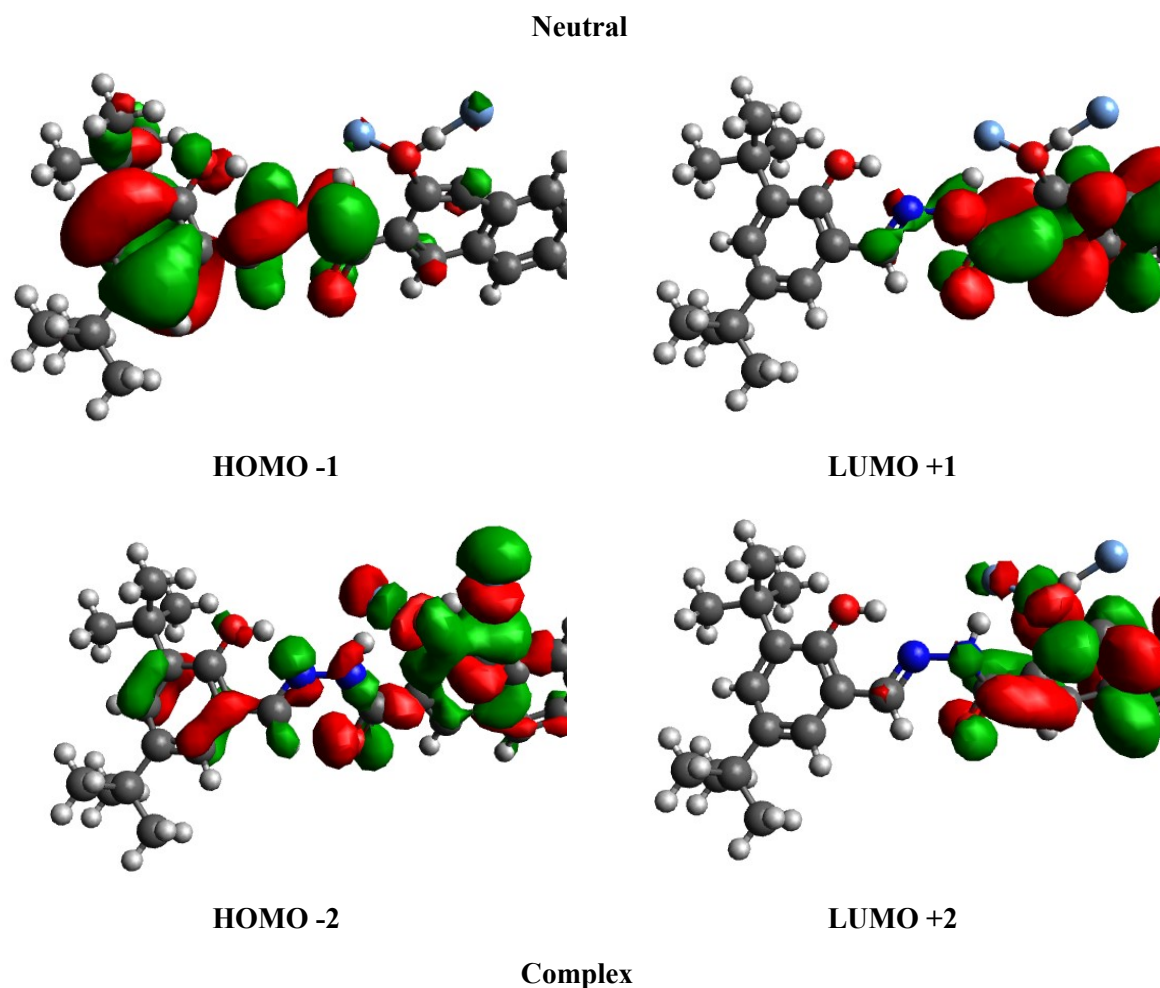

**Fig-S1-11:** The HOMO-LUMO structures of IF-1 and it's Complex

**Table S1:** Calculated  $E_{\text{HOMO}}$ ,  $E_{\text{LUMO}}$  and band gap of IF-1 and its **Complex**

| MOs    | IF-1    |                | Complex |                |
|--------|---------|----------------|---------|----------------|
|        | $E(eV)$ | $\Delta E(eV)$ | $E(eV)$ | $\Delta E(eV)$ |
| HOMO   | -5.717  | 4.1            | -5.827  | 0.776          |
| HOMO   | -5.717  | 4.1            | -5.827  | 0.776          |
| LUMO+1 | -0.855  | 5.479          | -2.921  | 3.514          |
| HOMO-1 | -6.334  |                | -6.435  |                |
| LUMO+2 | -0.419  | 5.969          | -1.867  | 4.944          |
| HOMO-2 | -6.388  |                | -6.811  |                |

**Table S2:** Global reactivity descriptors of IF-1 and its complex; unit in  $eV$

| GRPs     | IF-1   | Complex |
|----------|--------|---------|
| $IP$     | 5.717  | 5.827   |
| $EA$     | 1.617  | 5.051   |
| $X$      | 3.667  | 5.439   |
| $\eta$   | 2.05   | 0.388   |
| $\mu$    | -3.667 | -5.439  |
| $\omega$ | 3.279  | 38.122  |
| $\sigma$ | 0.243  | 1.289   |



**Table S3.** AIM properties of the main intra- and intermolecular interactions for **test**. Electronic density ( $\rho$ ), Laplacian of density ( $\nabla^2\rho$ ), ellipticity ( $\epsilon$ ) and density of potential energy ( $V$ ).

| BCP | Bond      | $\rho$ (e/a <sup>3</sup> ) | $\nabla^2\rho$ (e/a <sup>5</sup> ) | $\epsilon$ | $V$<br>(hartree.e/a <sup>3</sup> ) |
|-----|-----------|----------------------------|------------------------------------|------------|------------------------------------|
| 1   | C15 - C17 | +0.260591                  | -0.633727                          | +0.109318  | -0.279848                          |
| 2   | C1 - C2   | +0.298101                  | -0.783177                          | +0.145642  | -0.370323                          |
| 3   | C3 - C4   | +0.322605                  | -0.884760                          | +0.247868  | -0.446372                          |
| 4   | C2 - C3   | +0.300853                  | -0.797958                          | +0.151006  | -0.378164                          |
| 5   | C4 - C5   | +0.300411                  | -0.793371                          | +0.153115  | -0.379662                          |
| 6   | C1 - C11  | +0.304448                  | -0.816547                          | +0.143797  | -0.386473                          |
| 7   | C5 - C6   | +0.323276                  | -0.888397                          | +0.247176  | -0.448326                          |
| 8   | C1 - C6   | +0.300200                  | -0.795053                          | +0.149703  | -0.375710                          |
| 9   | C2 - C13  | +0.300761                  | -0.793071                          | +0.167232  | -0.380027                          |
| 10  | C3 - H7   | +0.278226                  | -0.947581                          | +0.016918  | -0.325957                          |
| 11  | C4 - H8   | +0.280494                  | -0.967125                          | +0.008441  | -0.328379                          |
| 12  | C11 - C15 | +0.319176                  | -0.863023                          | +0.230587  | -0.436137                          |
| 13  | C5 - H9   | +0.280229                  | -0.963506                          | +0.014491  | -0.328763                          |
| 14  | C17 - O18 | +0.400304                  | +0.010220                          | +0.084542  | -1.365782                          |
| 15  | C6 - H10  | +0.279350                  | -0.960453                          | +0.010612  | -0.326233                          |
| 16  | C17 - N19 | +0.315764                  | -0.973627                          | +0.132504  | -0.718714                          |
| 17  | C11 - H12 | +0.282540                  | -1.006134                          | +0.004621  | -0.329534                          |
| 18  | C15 - C16 | +0.296031                  | -0.782293                          | +0.198340  | -0.369310                          |
| 19  | C13 - C16 | +0.324880                  | -0.907016                          | +0.320180  | -0.460855                          |
| 20  | C13 - H14 | +0.273586                  | -0.907779                          | +0.029835  | -0.321925                          |
| 21  | C16 - O31 | +0.280437                  | -0.229374                          | +0.025085  | -0.788371                          |
| 22  | N19 - N20 | +0.345595                  | -0.617600                          | +0.071904  | -0.507204                          |
| 23  | N20 - C21 | +0.358345                  | -0.572297                          | +0.190753  | -1.065192                          |
| 24  | O18 - H22 | +0.023161                  | +0.079227                          | +0.098176  | -0.018668                          |
| 25  | C21 - H22 | +0.286344                  | -1.053367                          | +0.013619  | -0.335000                          |
| 26  | C21 - C23 | +0.282920                  | -0.730376                          | +0.119934  | -0.331092                          |
| 27  | C23 - C25 | +0.304954                  | -0.804367                          | +0.191732  | -0.393287                          |
| 28  | C24 - O60 | +0.298358                  | -0.271880                          | +0.002879  | -0.856314                          |
| 29  | C23 - C24 | +0.305390                  | -0.816512                          | +0.235346  | -0.392414                          |
| 30  | C25 - H28 | +0.279414                  | -0.957926                          | +0.012279  | -0.328965                          |
| 31  | C25 - C27 | +0.316586                  | -0.850063                          | +0.231697  | -0.429727                          |
| 32  | C27 - C29 | +0.304925                  | -0.801158                          | +0.180219  | -0.394769                          |
| 33  | C26 - C33 | +0.245742                  | -0.562991                          | +0.031725  | -0.252964                          |
| 34  | C24 - C26 | +0.305669                  | -0.825299                          | +0.225395  | -0.394250                          |
| 35  | C29 - H59 | +0.281265                  | -0.971260                          | +0.008712  | -0.333769                          |
| 36  | C27 - C34 | +0.249085                  | -0.578434                          | +0.031556  | -0.257286                          |
| 37  | C34 - C35 | +0.248467                  | -0.573394                          | +0.001469  | -0.257241                          |
| 38  | C26 - C29 | +0.311200                  | -0.818976                          | +0.224720  | -0.415608                          |
| 39  | C51 - H59 | +0.014580                  | +0.067393                          | +0.576660  | -0.010382                          |
| 40  | N19 - H30 | +0.343432                  | -1.853141                          | +0.052946  | -0.563466                          |
| 41  | H30 - O31 | +0.030738                  | +0.109129                          | +0.064231  | -0.025906                          |
| 42  | O31 - H32 | +0.361821                  | -2.079663                          | +0.021704  | -0.670397                          |
| 43  | C33 - C51 | +0.247796                  | -0.569810                          | +0.000729  | -0.256127                          |
| 44  | C35 - H36 | +0.271446                  | -0.885890                          | +0.006845  | -0.317395                          |
| 45  | C35 - H37 | +0.271473                  | -0.886033                          | +0.006798  | -0.317468                          |
| 46  | C35 - H38 | +0.271638                  | -0.886691                          | +0.006027  | -0.318116                          |
| 47  | C34 - C39 | +0.245055                  | -0.557986                          | +0.002874  | -0.252039                          |
| 48  | C39 - H40 | +0.271818                  | -0.889965                          | +0.007724  | -0.317241                          |
| 49  | C39 - H41 | +0.270678                  | -0.879930                          | +0.007516  | -0.316103                          |

|    |           |           |           |           |           |
|----|-----------|-----------|-----------|-----------|-----------|
| 50 | C39 - H42 | +0.272135 | -0.890573 | +0.007487 | -0.319007 |
| 51 | C33 - C43 | +0.243879 | -0.552569 | +0.006145 | -0.250099 |
| 52 | C43 - H44 | +0.270070 | -0.873727 | +0.011126 | -0.316024 |
| 53 | H45 - O60 | +0.015346 | +0.053709 | +0.123776 | -0.011619 |
| 54 | C43 - H45 | +0.276594 | -0.931694 | +0.007932 | -0.324465 |
| 55 | C43 - H46 | +0.270844 | -0.879973 | +0.011860 | -0.316812 |
| 56 | C33 - C47 | +0.243895 | -0.552648 | +0.006142 | -0.250131 |
| 57 | C47 - H48 | +0.270875 | -0.880318 | +0.011833 | -0.316840 |
| 58 | C47 - H50 | +0.270110 | -0.874007 | +0.011081 | -0.316122 |
| 59 | H49 - O60 | +0.015196 | +0.053293 | +0.126335 | -0.011490 |
| 60 | C47 - H49 | +0.276623 | -0.931848 | +0.007937 | -0.324561 |
| 61 | C51 - H53 | +0.271854 | -0.888478 | +0.005117 | -0.318537 |
| 62 | C51 - H52 | +0.271190 | -0.883421 | +0.006940 | -0.317259 |
| 63 | C51 - H54 | +0.271202 | -0.883418 | +0.006917 | -0.317301 |
| 64 | C34 - C55 | +0.245081 | -0.558026 | +0.002913 | -0.252097 |
| 65 | C55 - H56 | +0.270692 | -0.880032 | +0.007472 | -0.316134 |
| 66 | C55 - H57 | +0.271845 | -0.890253 | +0.007708 | -0.317272 |
| 67 | C55 - H58 | +0.272072 | -0.890144 | +0.007459 | -0.318870 |
| 68 | N20 - H61 | +0.046131 | +0.126499 | +0.044858 | -0.035598 |
| 69 | O60 - H61 | +0.335223 | -1.951311 | +0.017202 | -0.637722 |

**Table S4.** AIM properties of the main intra- and intermolecular interactions for **mode**. Electronic density ( $\rho$ ), Laplacian of density ( $\nabla^2\rho$ ), ellipticity ( $\epsilon$ ) and density of potential energy ( $V$ ).

| BCP | Bond      | $\rho$ (e/a <sup>3</sup> ) | $\nabla^2\rho$ (e/a <sup>5</sup> ) | $\epsilon$ | $V$<br>(hartree.e/a <sup>3</sup> ) |
|-----|-----------|----------------------------|------------------------------------|------------|------------------------------------|
| 1   | C1 - C2   | +0.317371                  | -0.885953                          | +0.151275  | -0.431628                          |
| 2   | C2 - C3   | +0.302809                  | -0.818853                          | +0.137741  | -0.389187                          |
| 3   | C4 - C5   | +0.295493                  | -0.770641                          | +0.130857  | -0.365201                          |
| 4   | C4 - H8   | +0.281963                  | -0.986086                          | +0.006340  | -0.328468                          |
| 5   | C3 - C4   | +0.335519                  | -0.964180                          | +0.241055  | -0.481468                          |
| 6   | C1 - C11  | +0.253939                  | -0.561839                          | +0.152795  | -0.274877                          |
| 7   | C5 - C6   | +0.317012                  | -0.850813                          | +0.235586  | -0.430991                          |
| 8   | C1 - C6   | +0.302524                  | -0.809074                          | +0.143395  | -0.384199                          |
| 9   | C2 - C13  | +0.342954                  | -1.062420                          | +0.114489  | -0.555937                          |
| 10  | C3 - H7   | +0.291268                  | -1.066905                          | +0.013027  | -0.350769                          |
| 11  | C5 - H9   | +0.294536                  | -1.082264                          | +0.006201  | -0.361119                          |
| 12  | C6 - H10  | +0.295836                  | -1.092912                          | +0.010342  | -0.367308                          |
| 13  | C11 - C14 | +0.259835                  | -0.553294                          | +0.254361  | -0.297032                          |
| 14  | C11 - H12 | +0.292531                  | -1.096101                          | +0.020349  | -0.354106                          |
| 15  | C14 - C15 | +0.303607                  | -0.815316                          | +0.177834  | -0.404719                          |
| 16  | C13 - C15 | +0.387336                  | -1.291055                          | +0.257111  | -0.690716                          |
| 17  | C14 - C16 | +0.305752                  | -0.878997                          | +0.111766  | -0.379380                          |
| 18  | C16 - O17 | +0.363952                  | -0.373064                          | +0.090185  | -1.127424                          |
| 19  | C16 - N18 | +0.247157                  | -0.520242                          | +0.163607  | -0.318680                          |
| 20  | N18 - N19 | +0.294064                  | -0.433909                          | +0.062124  | -0.396424                          |
| 21  | O17 - C20 | +0.014112                  | +0.055000                          | +2.565047  | -0.010274                          |
| 22  | N19 - C20 | +0.355993                  | -0.686926                          | +0.176688  | -1.026931                          |
| 23  | C20 - H21 | +0.305435                  | -1.189628                          | +0.005468  | -0.384076                          |
| 24  | C20 - C22 | +0.286517                  | -0.749770                          | +0.125467  | -0.341617                          |
| 25  | C22 - C23 | +0.306794                  | -0.829336                          | +0.222838  | -0.392064                          |
| 26  | C22 - C24 | +0.303782                  | -0.798464                          | +0.186351  | -0.390321                          |
| 27  | C23 - C25 | +0.311212                  | -0.860509                          | +0.224681  | -0.408972                          |
| 28  | C24 - H27 | +0.289943                  | -1.036846                          | +0.012822  | -0.356407                          |
| 29  | C24 - C26 | +0.327463                  | -0.915063                          | +0.230564  | -0.460300                          |
| 30  | C26 - C33 | +0.238037                  | -0.526767                          | +0.030712  | -0.237842                          |

---

|    |           |           |           |           |           |
|----|-----------|-----------|-----------|-----------|-----------|
| 31 | C33 - C54 | +0.239177 | -0.529808 | +0.002659 | -0.242200 |
| 32 | C25 - C28 | +0.304506 | -0.780582 | +0.220094 | -0.397700 |
| 33 | C26 - C28 | +0.308086 | -0.821354 | +0.170587 | -0.401454 |
| 34 | C15 - O30 | +0.241645 | -0.421150 | +0.036918 | -0.525674 |
| 35 | N18 - H29 | +0.343246 | -1.818020 | +0.037073 | -0.586412 |
| 36 | H29 - F62 | +0.103923 | +0.370556 | +0.032733 | -0.156409 |
| 37 | O30 - F62 | +0.216821 | +0.710127 | +0.052328 | -0.375318 |
| 38 | H31 - F61 | +0.105879 | +0.146570 | +0.006114 | -0.132312 |
| 39 | O30 - H31 | +0.304463 | -1.814718 | +0.021042 | -0.680613 |
| 40 | C25 - C32 | +0.242932 | -0.548337 | +0.031384 | -0.248741 |
| 41 | C33 - C34 | +0.244009 | -0.550633 | +0.002457 | -0.249822 |
| 42 | C34 - H36 | +0.286831 | -0.994862 | +0.001971 | -0.359881 |
| 43 | C33 - C38 | +0.239588 | -0.531281 | +0.001868 | -0.242482 |
| 44 | C34 - H35 | +0.289526 | -1.020171 | +0.002579 | -0.365842 |
| 45 | H27 - H36 | +0.016899 | +0.074250 | +0.759255 | -0.011513 |
| 46 | C34 - H37 | +0.285540 | -0.988988 | +0.002817 | -0.355730 |
| 47 | C38 - H40 | +0.285245 | -0.987242 | +0.004326 | -0.355058 |
| 48 | C38 - H39 | +0.287509 | -1.005359 | +0.004097 | -0.359707 |
| 49 | H41 - H58 | +0.013787 | +0.056128 | +0.600833 | -0.008630 |
| 50 | C38 - H41 | +0.287367 | -0.999862 | +0.003423 | -0.361193 |
| 51 | C32 - C42 | +0.243938 | -0.550806 | +0.004931 | -0.250924 |
| 52 | C42 - H44 | +0.288342 | -1.014571 | +0.003977 | -0.359130 |
| 53 | C42 - H43 | +0.286044 | -0.991734 | +0.006649 | -0.358495 |
| 54 | H44 - O59 | +0.009388 | +0.036102 | +0.346187 | -0.006797 |
| 55 | C42 - H45 | +0.287815 | -1.005496 | +0.007444 | -0.362516 |
| 56 | C32 - C46 | +0.241311 | -0.538721 | +0.005619 | -0.246247 |
| 57 | C23 - O59 | +0.321050 | +0.034937 | +0.012558 | -1.013323 |
| 58 | C46 - H47 | +0.284633 | -0.979199 | +0.013387 | -0.355460 |
| 59 | H48 - O59 | +0.025059 | +0.089138 | +0.032475 | -0.020774 |
| 60 | C46 - H48 | +0.294000 | -1.065751 | +0.005795 | -0.367929 |
| 61 | C46 - H49 | +0.285058 | -0.982196 | +0.013201 | -0.357687 |
| 62 | C50 - H51 | +0.287896 | -1.007836 | +0.002496 | -0.361640 |
| 63 | H53 - H58 | +0.017807 | +0.076497 | +0.786464 | -0.012251 |
| 64 | C50 - H52 | +0.286218 | -0.995448 | +0.002622 | -0.356912 |
| 65 | C32 - C50 | +0.240009 | -0.533451 | +0.002137 | -0.242508 |
| 66 | C28 - H58 | +0.285239 | -1.006120 | +0.010285 | -0.341727 |
| 67 | C50 - H53 | +0.286177 | -0.988718 | +0.002008 | -0.358873 |
| 68 | C54 - H55 | +0.285337 | -0.987714 | +0.005104 | -0.355604 |
| 69 | C54 - H56 | +0.288775 | -1.015645 | +0.005079 | -0.363111 |
| 70 | C54 - H57 | +0.285645 | -0.990724 | +0.004715 | -0.355429 |
| 71 | N19 - H60 | +0.049501 | +0.141469 | +0.036608 | -0.040771 |
| 72 | O59 - H60 | +0.356605 | -2.310350 | +0.012261 | -0.740936 |

---
